# Supplementary material
Source: PubMed Central journal article supplement (PMC11113718)
Supplement: 18_2013_1528_MOESM1_ESM.pdf [file 18_2013_1528_MOESM1_ESM.pdf]

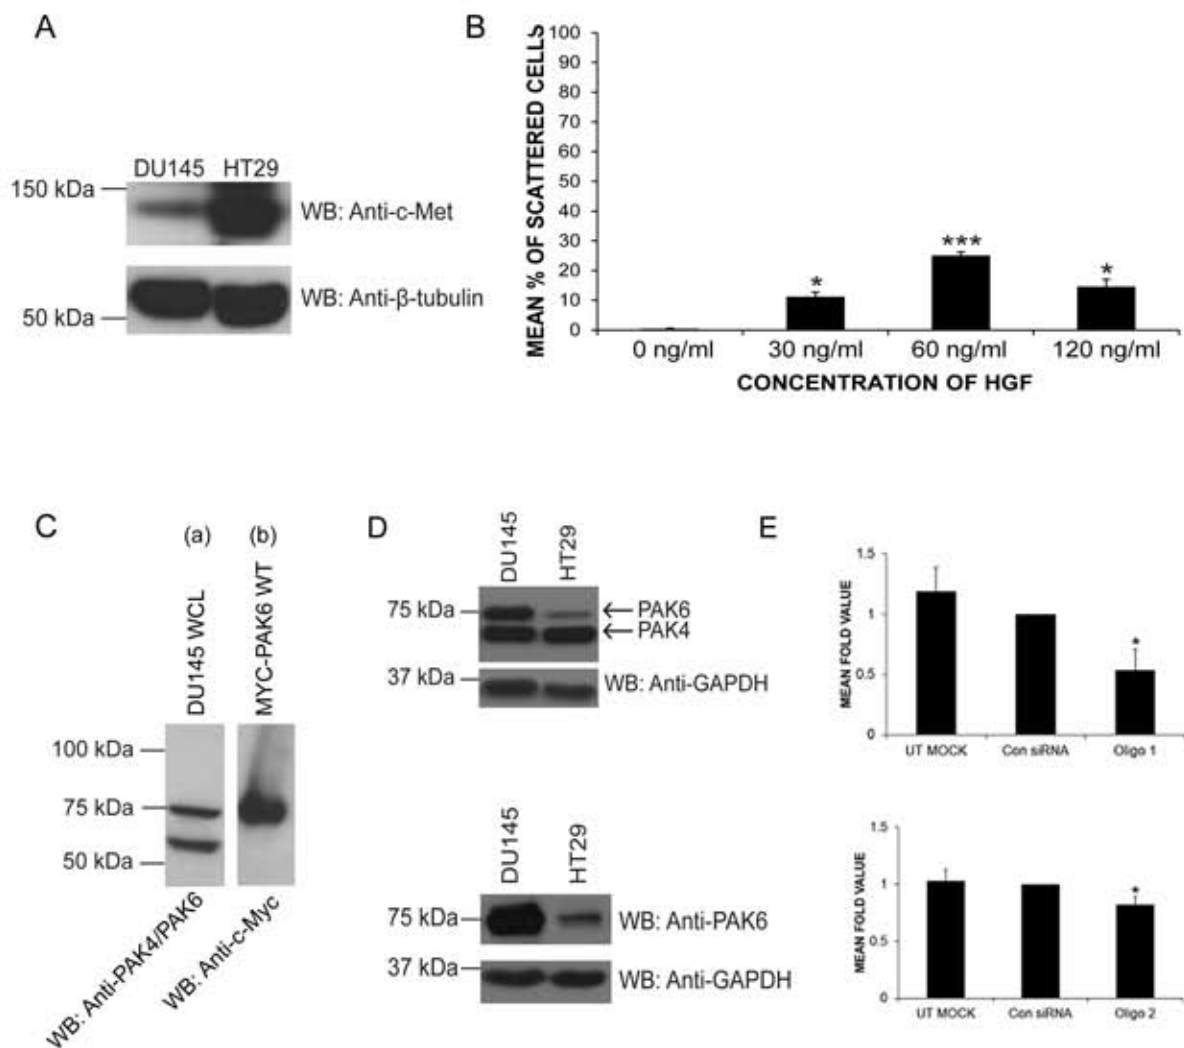

**Figure S1** **A)** DU145 and HT29 whole cell lysates were immunoblotted for c-Met expression and for  $\beta$ -tubulin as a loading control. **B)** The HGF-induced scatter assay was conducted using HT29 cells. Cells were seeded onto glass coverslips and serum-starved for 24 hours prior to 24 hours HGF stimulation at varying concentrations. Cells were then fixed and stained for F-Actin. Cells were counted and cell counts of serum-starved versus serum-starved plus HGF were compared. Scattered = loss of cell: cell junctions and single cells with an elongated migratory phenotype. The mean % of scattered cells and the standard error of the mean were calculated over 3 independent experiments. Statistical significance compared with minus HGF cells was calculated using Student's *t*-test; \*,  $P < 0.05$  \*\*\*,  $P < 0.0005$ . **C)** DU145 whole cell lysate (WCL) was immunoblotted for PAK4/PAK6 expression using an anti-PAK4 antibody that recognises PAK6 (anti-PAK4/PAK6 antibody). (b) HEK293 cells expressing WT MYC-PAK6 were lysed and the lysate immunoblotted for PAK6 expression using an anti-c-Myc antibody. **D)** Whole cell lysates for the indicated cell lines were immunoblotted using the anti-PAK4/PAK6 antibody, an anti-PAK6 specific antibody as indicated. Lysates were also immunoblotted for GAPDH as a loading control. Data are representative of 3 independent experiments. **E)** the mean fold value and the standard error of the mean were calculated over 3 independent experiments. Statistical significance compared between Con siRNA and UT Mock or PAK6 siRNA (Oligo 1 or 2) was calculated using Student's *t*-test; \*,  $P < 0.05$ ,

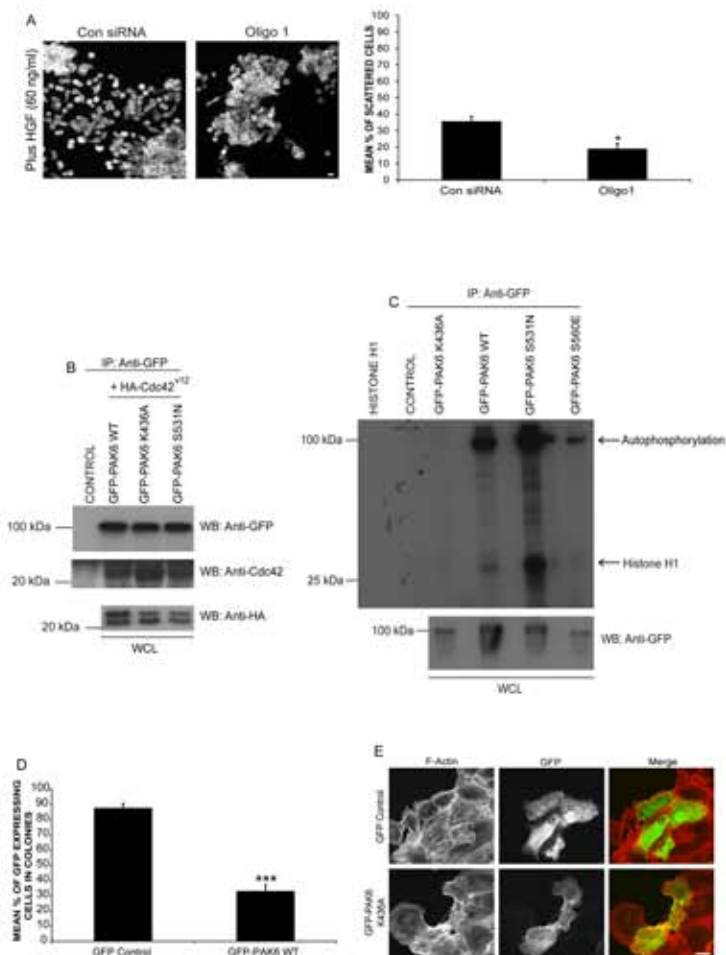

**Figure S2 A)** HT29 cells were transfected with con or PAK6 siRNA (oligo 1). Following 72 hours, cells were serum-starved, stimulated with HGF for 24 hours, fixed, stained for F-Actin and scored for cell scattering. **B)** HEK293 cells were co-transfected with the indicated GFP-PAK6 mutants and HA-Cdc42<sup>v12</sup>. PAK6 was immunoprecipitated using an anti-GFP antibody. IPs were immunoblotted using anti-GFP and anti-Cdc42 antibodies. WCL were immunoblotted using an anti-HA antibody **C)** GFP-PAK6<sup>WT</sup> or derivatives was immunoprecipitated from cells and used in an in vitro kinase assay with histone H1 as a substrate. **D)** HT29 cells were transfected with GFP control or GFP-PAK6<sup>WT</sup> serum-starved cells were fixed and stained for F-Actin. The % of GFP expressing cells present within a colony was calculated. **D)** DU145 cells were transfected with GFP control or GFP-PAK6<sup>K436A</sup>. Cells were serum-starved for 24 hours, fixed and stained for F-Actin. bar = 10  $\mu$ m Statistical significance was calculated using Student's *t*-test; \*,  $P < 0.05$ . The mean values and the standard error of the mean were calculated over 3 independent experiments. The blots shown are representative of 3 independent experiments.

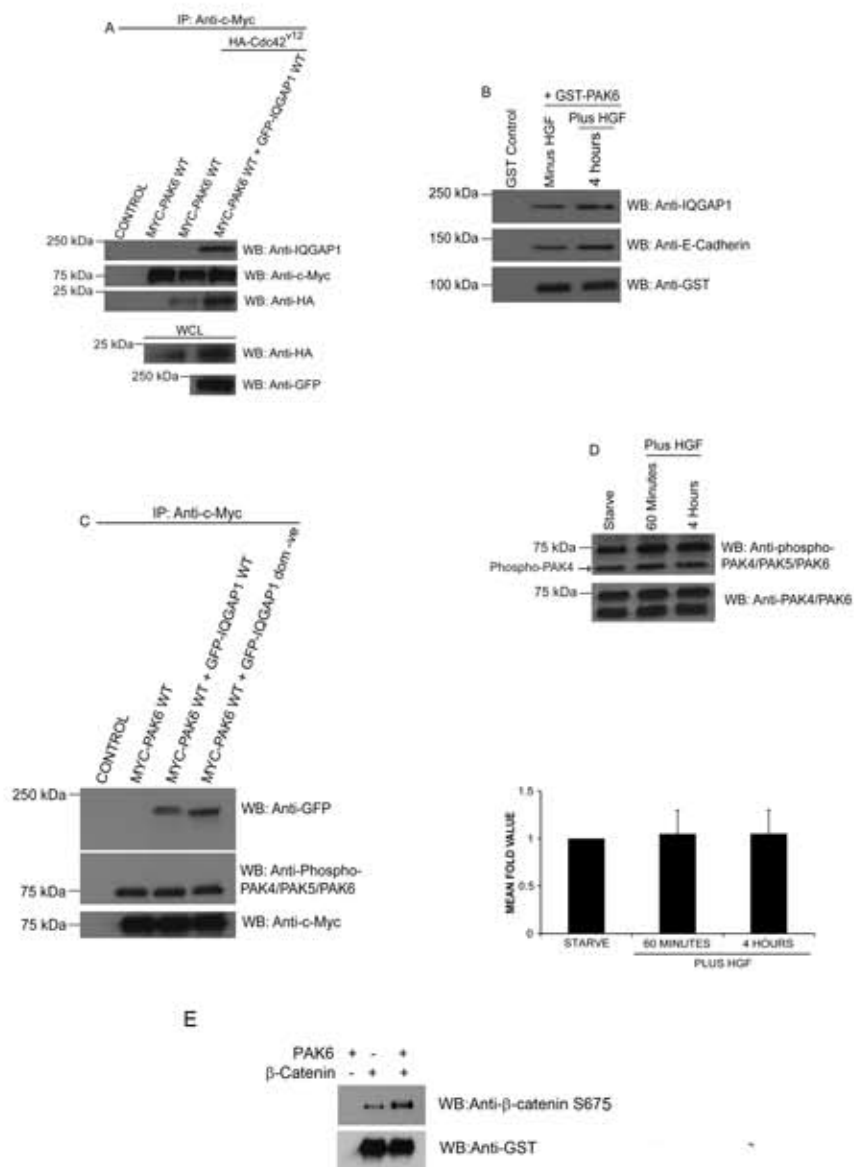

**Figure S3** A) HEK293 cells were transfected with MYC-PAK6<sup>WT</sup>, GFP-IQGAP1<sup>WT</sup> and HA-Cdc42<sup>v12</sup> as indicated. The cells were lysed and MYC-PAK6<sup>WT</sup> was immunoprecipitated using an anti-c-Myc antibody. Samples were immunoblotted with an anti-GFP antibody, an anti-c-Myc antibody and an anti-HA antibody. Whole cell lysates (WCL) were immunoblotted using anti-HA and anti-GFP antibodies as loading controls. The blots shown are representative of 3 independent experiments. In (A) bar = 10  $\mu$ m. B) HEK293 cells were transfected with WT MYC-PAK6, or co-transfected with WT MYC-PAK6 and WT GFP-IQGAP1 or dominant negative (dom -ve) GFP-IQGAP1. The cells were lysed and WT MYC-PAK6 was immunoprecipitated using an anti-c-Myc antibody (IP) from cell lysates. The samples were immunoblotted for GFP-IQGAP1 using an anti-GFP antibody and also for WT MYC-PAK6 using an anti-c-Myc antibody as a loading control. The IP samples were immunoblotted for levels of PAK6 autophosphorylation at serine 560 using a phospho-PAK4/PAK5/PAK6 antibody. C) GST-PAK6 or GST was used in a pull-down from serum starved or HGF stimulated DU145 cell lysates as indicated. Pull down samples were immunoblotted for endogenous IQGAP1 and endogenous E-cadherin. D) DU145 cell lysates were probed for the level of phospho-PAK6 S560 following prolonged HGF stimulation. Autoradiographs were analysed by densitometry and the phospho-signal was normalised to total protein. Representative of 3 independent experiments. E) *in vitro* kinase assay using HIS-PAK6 and GST- $\beta$ -catenin. Samples were probed for phospho-serine 675 and GST as a loading control

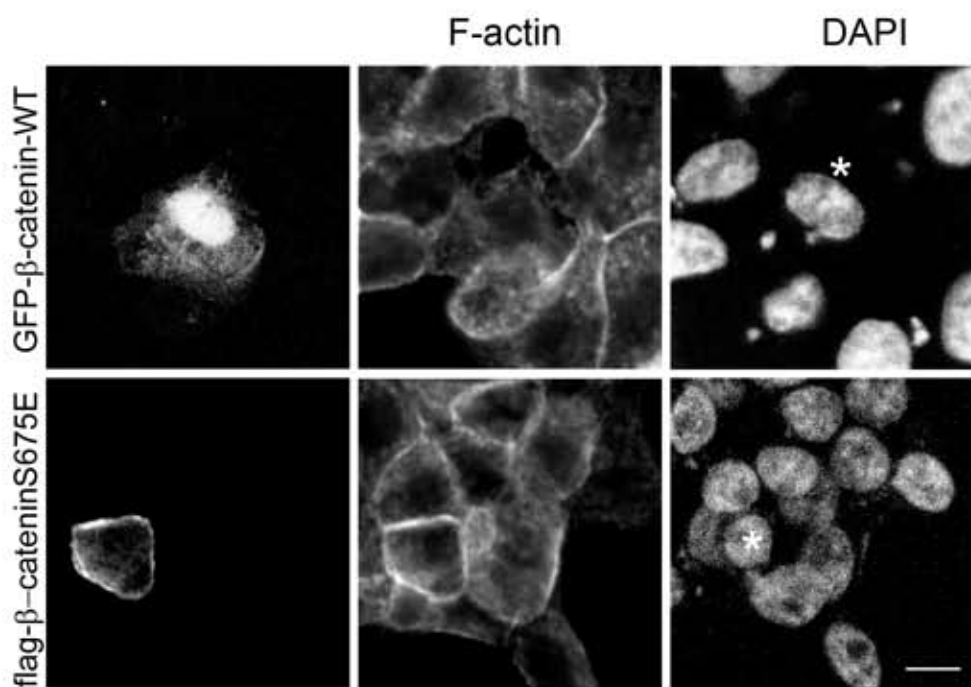

Figure S4. Capan-1 cells were transfected with GFP- $\beta$ -catenin-WT or flag- $\beta$ -cateninS675A. Cells were fixed and stained for DAPI, F-Actin and flag-tag where required. Representative of 3 independent experiments. bar = 10  $\mu$ m.
